# Supplementary material
Source: PubMed Central journal article supplement (PMC6021123)
Supplement: NIHMS948434-supplement-Supplementary_Information.pdf [file NIHMS948434-supplement-Supplementary_Information.pdf]

Supplementary Information for

**Pluripotency Factors Functionally Pre-mark Cell-Type-Restricted  
Enhancers in ESCs**

**Supplementary Table 1. Deep-Seq Data from Published Sources.**

DATA from ESC

|            |                     |
|------------|---------------------|
| GSM722693  | H3K4me1-heart       |
| GSM722699  | H3K4me1-kidney      |
| GSM722637  | H3K4me1-bone-marrow |
| GSM722632  | H3K4me1-cortex      |
| GSM722860  | H3K4me1-lung        |
| GSM722991  | H3K4me1-spleen      |
| GSM723001  | H3K4me1-spleen      |
| GSM851273  | H3K27ac-heart       |
| GSM851274  | H3K27ac-kidney      |
| GSM851270  | H3K27ac-bone-marrow |
| GSM851272  | H3K27ac-cortex      |
| GSM851276  | H3K27ac-lung        |
| GSM851279  | H3K27ac-spleen      |
| GSM1082340 | ES-Oct4-V6.5        |
| GSM1082341 | ES-Sox2-V6.5        |
| GSM1082342 | ES-Nanog-V6.5       |
| GSM288345  | ES_Nanog            |
| GSM288346  | ES_Oct4             |
| GSM288347  | ES_Sox2             |
| GSM288348  | ES_Smad1            |
| GSM288349  | ES_E2f1             |
| GSM288350  | ES_Tcfcp2l1         |
| GSM288352  | ES_Zfx              |
| GSM288353  | ES_STAT3            |
| GSM288354  | ES_Klf4             |
| GSM288355  | ES_Esrrb            |
| GSM288356  | ES_c-Myc            |
| GSM288357  | ES_n-Myc            |
| GSM307619  | ES H3K27me3         |
| GSM845236  | ES H3K27ac          |
| GSM281695  | ES H3K4me1          |
| GSM288359  | ES p300             |
| GSM1014544 | ES IgG              |
| GSM1036277 | 5hmC                |
| GSM1036278 | 5mC                 |
| GSM659799  | Tet1                |
| GSM1341311 | Tdg                 |

|            |       |
|------------|-------|
| GSM1014154 | Dnase |
|------------|-------|

DATA from Peritoneal macrophage

|            |            |
|------------|------------|
| GSM1183907 | PM-GroSeq  |
| GSM1183943 | PM-H3K4me2 |
| GSM1183968 | PM-Pu.1    |
| GSM1183973 | PM-p65     |
| GSM1183979 | PM-CEBPa   |
| GSM1183989 | PM-H3K27Ac |

DATA from mesoderm

|            |             |
|------------|-------------|
| GSM1359829 | MES_H3K4me1 |
| GSM1359831 | MES_H3K27ac |

DATA in hematopoiesis

|            |                |
|------------|----------------|
| GSM1441285 | LT_HSC_H3K4me1 |
| GSM1441286 | ST_HSC_H3K4me1 |
| GSM1441287 | MPP_H3K4me1    |
| GSM1441288 | CMP_H3K4me1    |
| GSM1441289 | GMP_H3K4me1    |
| GSM1441295 | MF_H3K4me1     |
| GSM1441269 | LT_HSC_H3K27Ac |
| GSM1441270 | ST_HSC_H3K27Ac |
| GSM1441271 | MPP_H3K27Ac    |
| GSM1441272 | CMP_H3K27Ac    |
| GSM1441273 | GMP_H3K27Ac    |
| GSM1441279 | MF_H3K27Ac     |
| GSM2062718 | LSK_5hmC       |
| GSM2062721 | CMP_5hmC       |
| GSM2062724 | GMP_5hmC       |

**Supplementary Table 2. gRNA and mutant test primer sets for CRISPR/Cas9 assay, and Primer sets for ChIP-qPCR, RT-qPCR and 4C**

gRNA

|                   |                                                    |
|-------------------|----------------------------------------------------|
| TLR1 sgRNA        | ACAACCTCAGTAAAGGTCAAAAGG                           |
| Tnfaip3 sgRNA     | TGACCTTTAGATTTAAAGGAAGG                            |
| Prdx5 sgRNA       | CCAGAAGGCACCCAAGGTCAAGC                            |
| Nod2 sgRNA        | GAAAGCAAACCTGACCTTCAGGG                            |
| Nek1 sgRNA (N4)   | ACTAAACCCCCATTGTGCCTGGG<br>GGGGTTTAGTGGGTAACAAAAGG |
| Ankrd1 sgRNA (N8) | TAGTCACACTGGGCGGGGCAGGG<br>ACATCATTTACCTAGAAAAGAGG |

CRISPR/Cas9 Mutant test Primer sets

|                     |                          |
|---------------------|--------------------------|
| TLR1-cas9-F         | CTGTGTGGAAAGAGACCGCAA    |
| TLR1-cas9-R         | GAGAGCATAGTCCTTTCCCATC   |
| Tnfaip3-cas9-F      | TTAGCTGCCACCCAAACGG      |
| Tnfaip3-cas9-R      | TCGCTCAGAACGATGTAGGG     |
| Prdx5-Cas9-F        | ATCCCCACGTAAGCAAGGTG     |
| Prdx5-Cas9-R        | TCTTCCAGTGGGAATTCTCTTAGT |
| Nod2-Cas9-F         | CTCCCAAGTAGTCAGTCCCA     |
| Nod2-Cas9-R         | GTTACACGAGGGACGCTCAAG    |
| Nek1 (N4) -Cas9-F   | GTGGAGTTTCTTTCAGGGCAT    |
| Nek1 (N4) -Cas9-R   | AAATGACCTCTGGCCTTCCAC    |
| Ankrd1 (N8) -Cas9-F | CCAACCTGGGCTAGTCACACT    |
| Ankrd1 (N8) -Cas9-R | CTCCGGTTGCCATACATCATT    |

4C Primer sets

|           |                                       |
|-----------|---------------------------------------|
| 4C IL1a-F | AATGATACGGCGACCACCGAACACTCTTTCCCTACAC |
|-----------|---------------------------------------|

|              |                                                                                    |
|--------------|------------------------------------------------------------------------------------|
|              | GACGCTCTTCCGATCTAGGGTCACAGAACCTAAAGCT<br>T                                         |
| 4C_IL1a-R    | CAAGCAGAAGACGGCATAACGAAGGAAAGCAAAAGA<br>GGCTAT                                     |
| 4C_Tnfaip3-F | AATGATACGGCGACCACCGAACACTCTTCCCTACAC<br>GACGCTCTTCCGATCTCTAAATACACTTCTCAAAGCT<br>T |
| 4C_Tnfaip3-R | CAAGCAGAAGACGGCATAACGAGCACAGAGAACAGCA<br>CACCT                                     |

#### ChIP-qPCR and RT-qPCR Primer sets

|                     |                          |
|---------------------|--------------------------|
| TLR1e-F             | GTGTGGAAAGAGACCGCAAT     |
| TLR1e-R             | GGGGGTTTCCTCTGTGAAAT     |
| Tnfaip3e-F          | GAAACGCTTGTGAGGGAATG     |
| Tnfaip3e-R          | GCTGGAGCTAACCAACAACC     |
| Prdx5e-F            | ATCCCCACGTAAGCAAGGTG     |
| Prdx5e-R            | TCTTCCAGTGGGAATTCTCTTAGT |
| Nod2e-F             | CTCCCAAGTAGTCAGTCCCA     |
| Nod2e-R             | GTTACACGAGGGACGCTCAAG    |
| Nek1e (N4) -F       | GTGGAGTTTCTTTCAGGGCAT    |
| Nek1e (N4) -R       | AAATGACCTCTGGCCTTCCAC    |
| Ankrd1e (N8) -F     | CCAACCTGGGCTAGTCACACT    |
| Ankrd1e (N8) -R     | CTCCGGTTGCCATACATCATTT   |
| C/EBP $\alpha$ -m-F | CAAAGCCAAGAAGTCGGTGGACAA |
| C/EBP $\alpha$ -m-R | TCATTGTGACTGGTCAACTCCAGC |
| C/EBP $\beta$ -m-F  | GGTTTCGGGACTTGATGCA      |
| C/EBP $\beta$ -m-R  | CAACAACCCCGCAGGAAC       |
| Oct4-m-F            | CCAATCAGCTTGGGCTAGAG     |
| Oct4-m-R            | CCTGGGAAAGGTGTCCTGTA     |
| Sox1-m-F            | CACAACCTCGGAGATCAGCAA    |
| Sox1-m-R            | GTCCTTCTTGAGCAGCGTCT     |
| Nanog-m-F           | AGGGTCTGCTACTGAGATGCTCTG |
| Nanog-m-R           | CAACCACTGGTTTTTCTGCCACCG |
| FGF5-m-F            | ATCTTCTGCAGCCACCTGAT     |
| FGF5-m-R            | GAGGAGGCAGAAGACGAAGA     |
| Nestin-m-F          | AGGCTGAGAACTCTCGCTTA     |
| Nestin-m-R          | ATTAGGCAAGGGGGAAGAGA     |
| Pax6-m-F            | AGGGGGAGAGAACACCAACT     |
| Pax6-m-R            | CATTTGGCCCTTCGATTAGA     |
| Esrrb-m-F           | ACATTGCCTCTGGCTACCAC     |
| Esrrb-m-R           | CGCACACCTTCTTCAGCAT      |

|           |                      |
|-----------|----------------------|
| GAPDH-m-F | TGTGCAGTGCCAGCCTC    |
| GAPDH-m-R | ATGAAGGGGTCGTTGATGGC |
